# Supplementary material for: Can a single water molecule really affect the HO2+ NO2hydrogen abstraction reaction under tropospheric conditions?
Source: Royal Society of Chemistry journal article supplement (doi:10.1039/c5cp00968e), 2015-01-01
Supplement: c5cp00968e1.pdf [file c5cp00968e1.pdf]

## Supporting information

-for-

### **Can a Single Water Molecule Affect the Hydrogen Abstraction Reaction of HO<sub>2</sub>+NO<sub>2</sub> under Tropospheric Conditions?**

**Tianlei Zhang<sup>a,\*</sup>, Rui Wang<sup>a</sup>, Hao Chen<sup>a</sup>, Suotian Min<sup>a</sup>, Zhiyin Wang<sup>a</sup>,  
Caibin Zhao<sup>a</sup>, Qiong Xu<sup>a</sup>, Lingxia Jin<sup>a</sup>, Wenliang Wang<sup>b,\*</sup>, Zhuqing Wang<sup>c</sup>**

*<sup>a</sup> School of Chemical & Environment Science, Shaanxi University of Technology, Hanzhong, Shaanxi 723001, China*

*<sup>b</sup> Key Laboratory for Macromolecular Science of Shaanxi Province, School of Chemistry & Chemical Engineering, Shaanxi Normal University, Xi'an, Shaanxi 710062, China*

*<sup>c</sup> Shandong Provincial Key Laboratory of Ocean Environment Monitoring Technology, Shandong Academy of Sciences Institute of Oceanographic Instrumentation, Qingdao 266001, China.*

---

\* Corresponding authors. Tel: +86-0916-2641083, Fax: +86-0916-2641083.

e-mail: [ztianlei88@163.com](mailto:ztianlei88@163.com) (T. L. Zhang); [wlwang@snnu.edu.cn](mailto:wlwang@snnu.edu.cn) (W. L. Wang).

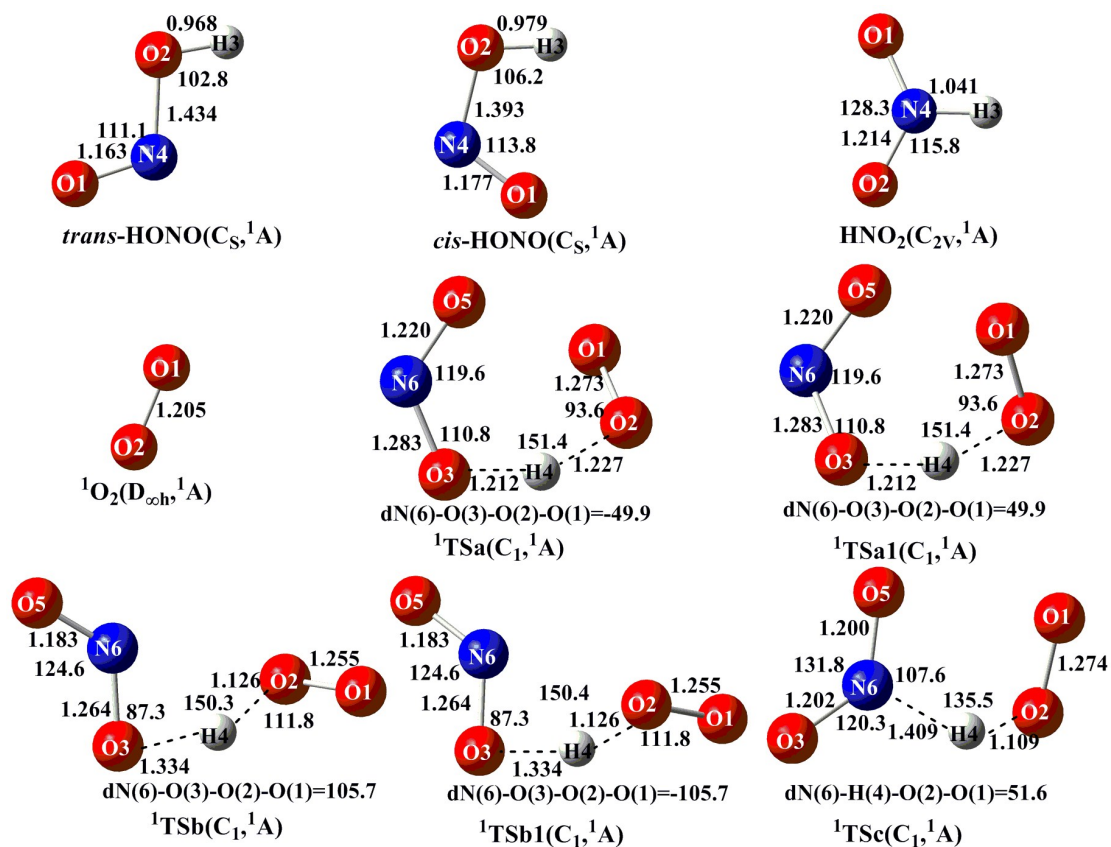

**Fig. S1** Geometrical parameters for the singlet naked reaction of  $HO_2+NO_2$  optimized at the CCSD(T)/aug-cc-pVTZ//B3LYP/aug-cc-pVTZ level of theory

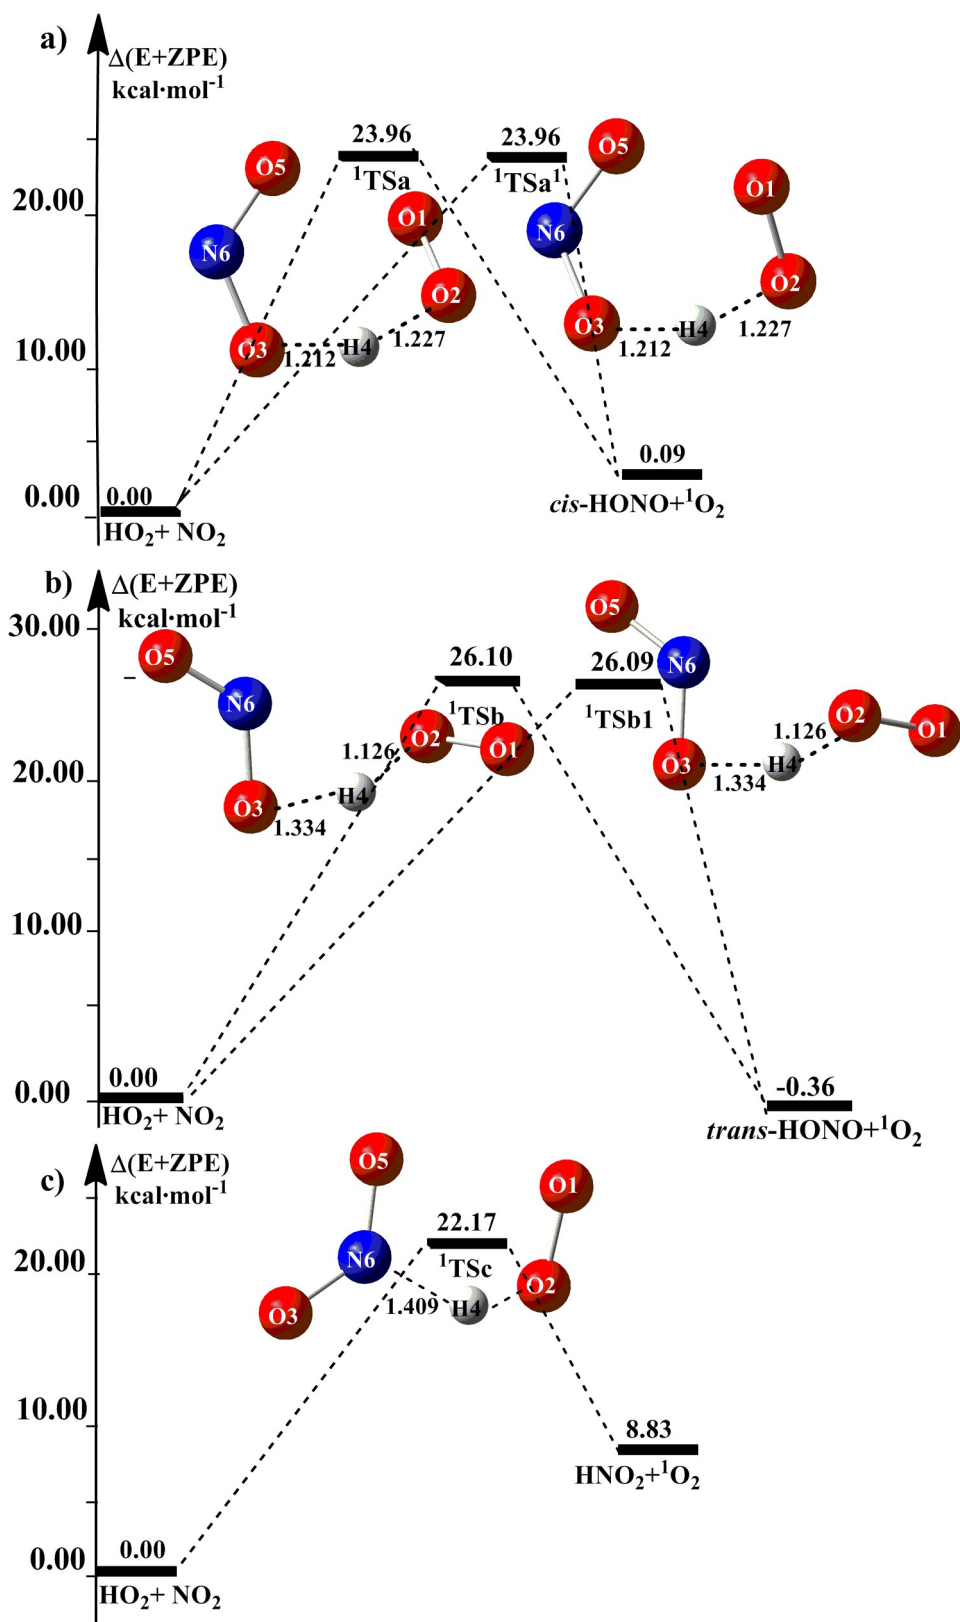

**Fig. S2** Schematic energy diagram of the formation of (a)*cis*-HONO+<sup>1</sup>O<sub>2</sub>; (b) *trans*-HONO+<sup>1</sup>O<sub>2</sub> and (c)HNO<sub>2</sub>+<sup>1</sup>O<sub>2</sub> involved in the singlet reaction of HO<sub>2</sub> + NO<sub>2</sub> Energies (kcal·mol<sup>-1</sup>) computed at the CCSD(T)/aug-cc-pVTZ//B3LYP/aug-cc-pVTZ level include zero-point energy correction.

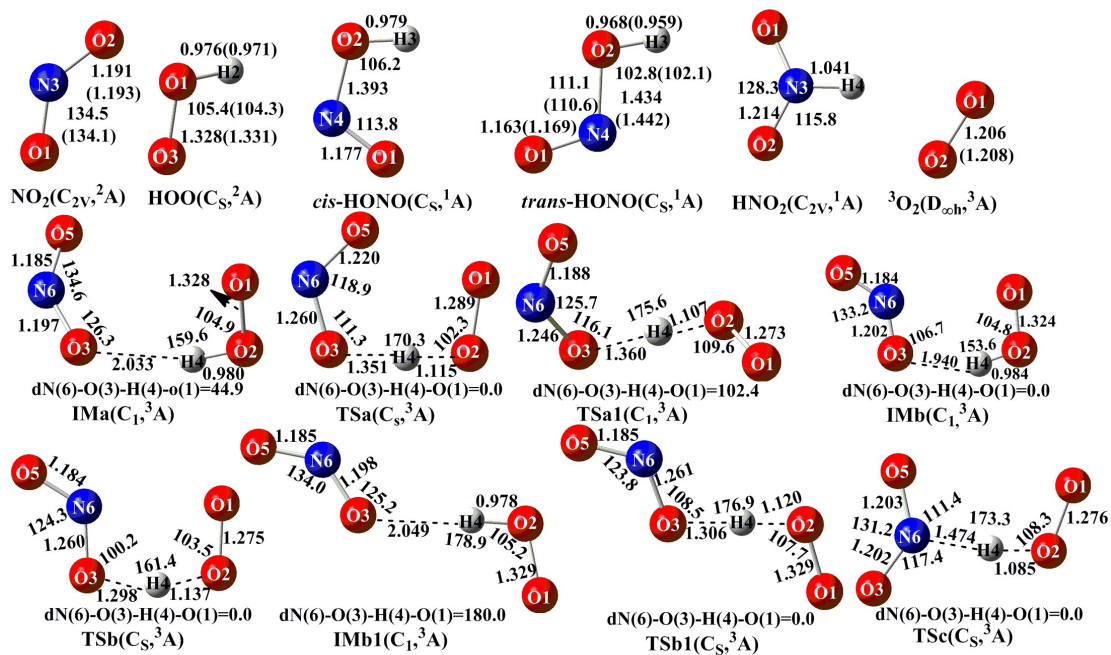

**Fig. S3** Geometrical parameters for the triplet naked reaction of  $\text{HO}_2+\text{NO}_2$  optimized at the CCSD(T)/aug-cc-pVTZ//B3LYP/aug-cc-pVTZ level of theory

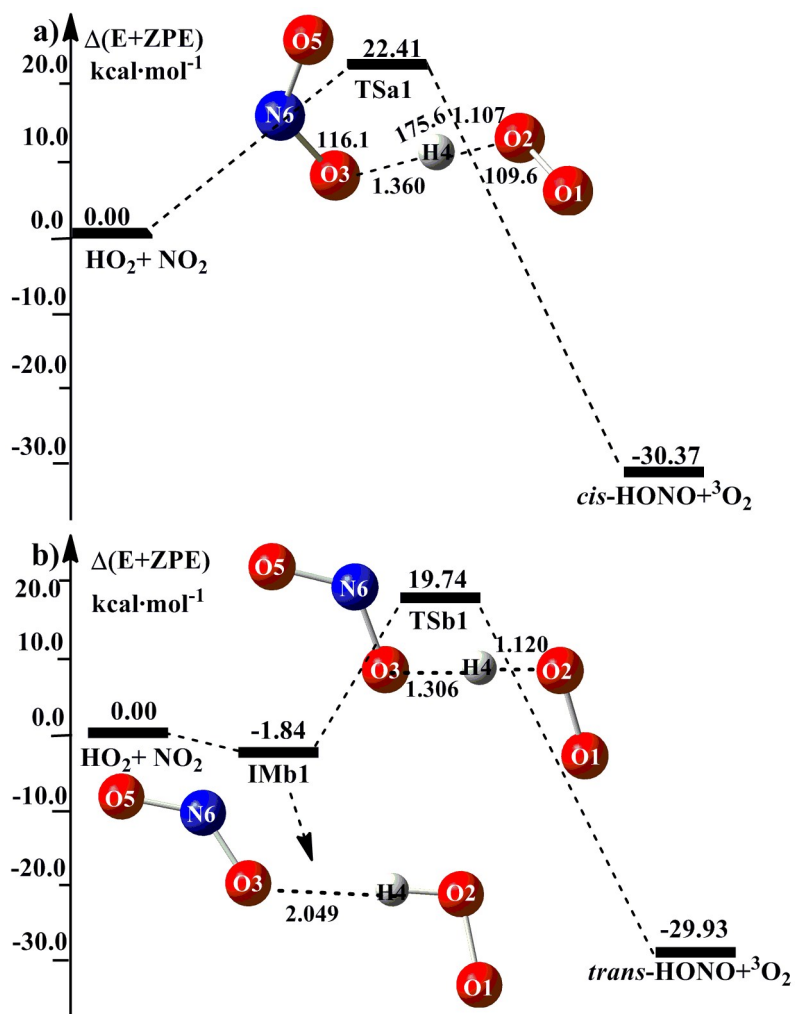

**Fig. S4** Less favorable schematic energy diagram of the formation of (a) $\text{cis-HONO}+^3\text{O}_2$ ; (b)  $\text{trans-HONO}+^3\text{O}_2$  involved in the triplet reaction of  $\text{HO}_2 + \text{NO}_2$  Energies ( $\text{kcal}\cdot\text{mol}^{-1}$ ) computed at the CCSD(T)/aug-cc-pVTZ//B3LYP/aug-cc-pVTZ level include zero-point energy correction.

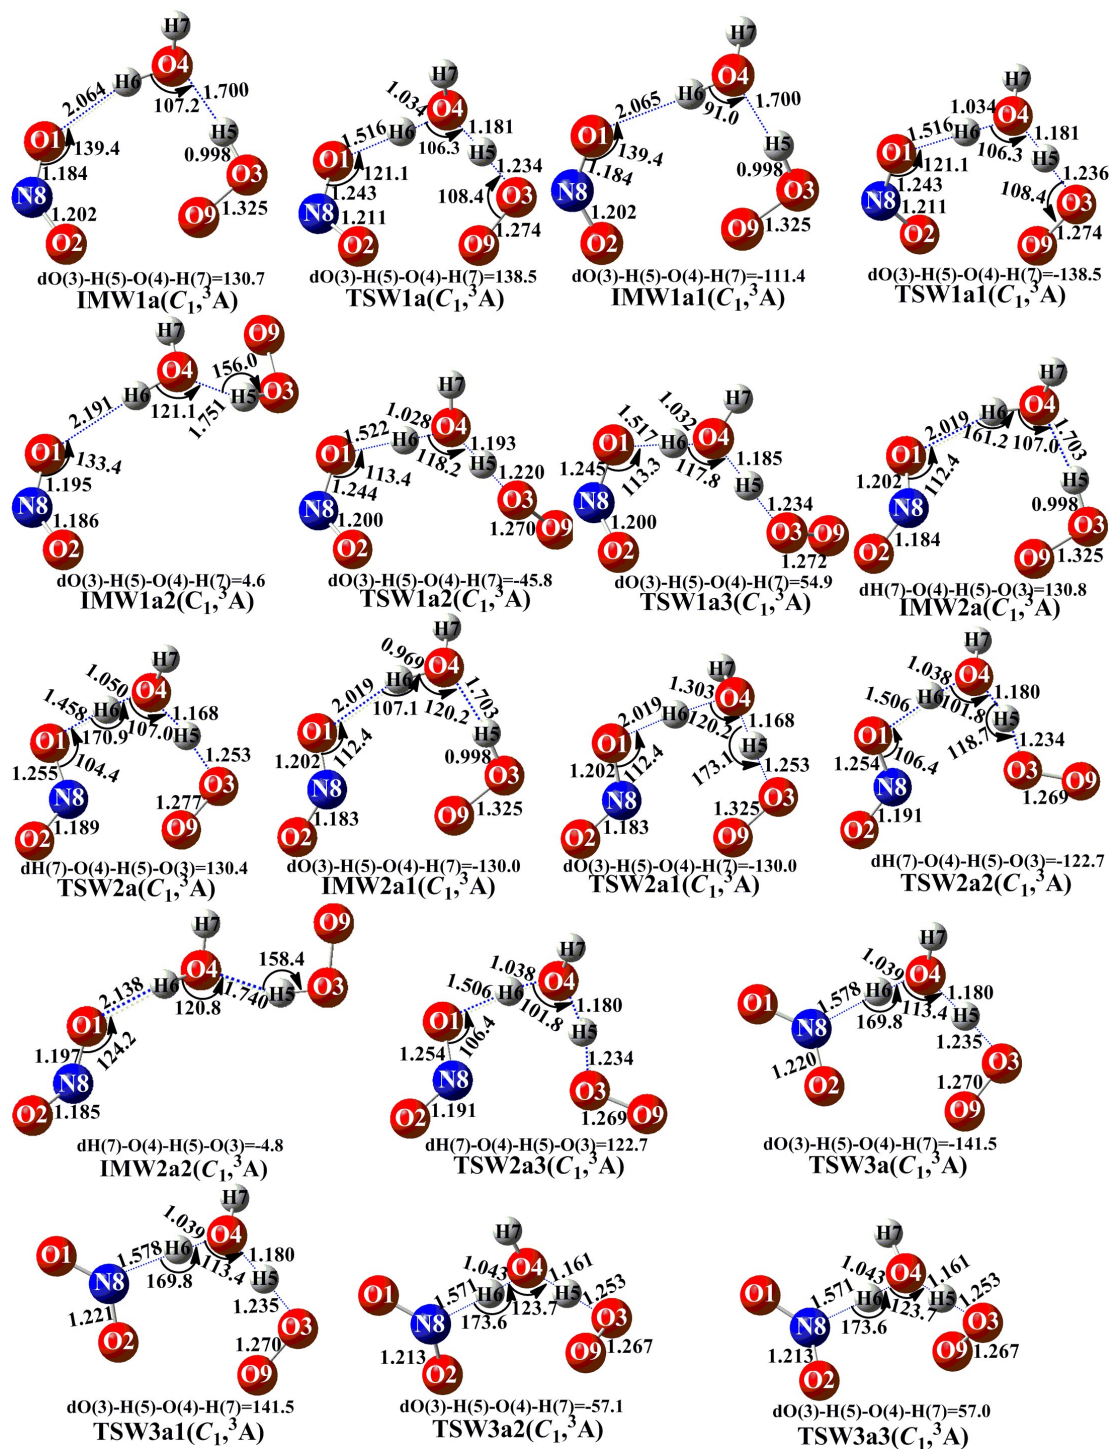

**Fig S5** The geometrical structures of the optimized transition state, intermediates, and complexes involving the  $\text{H}_2\text{O}\cdots\text{HO}_2+\text{NO}_2$  reaction

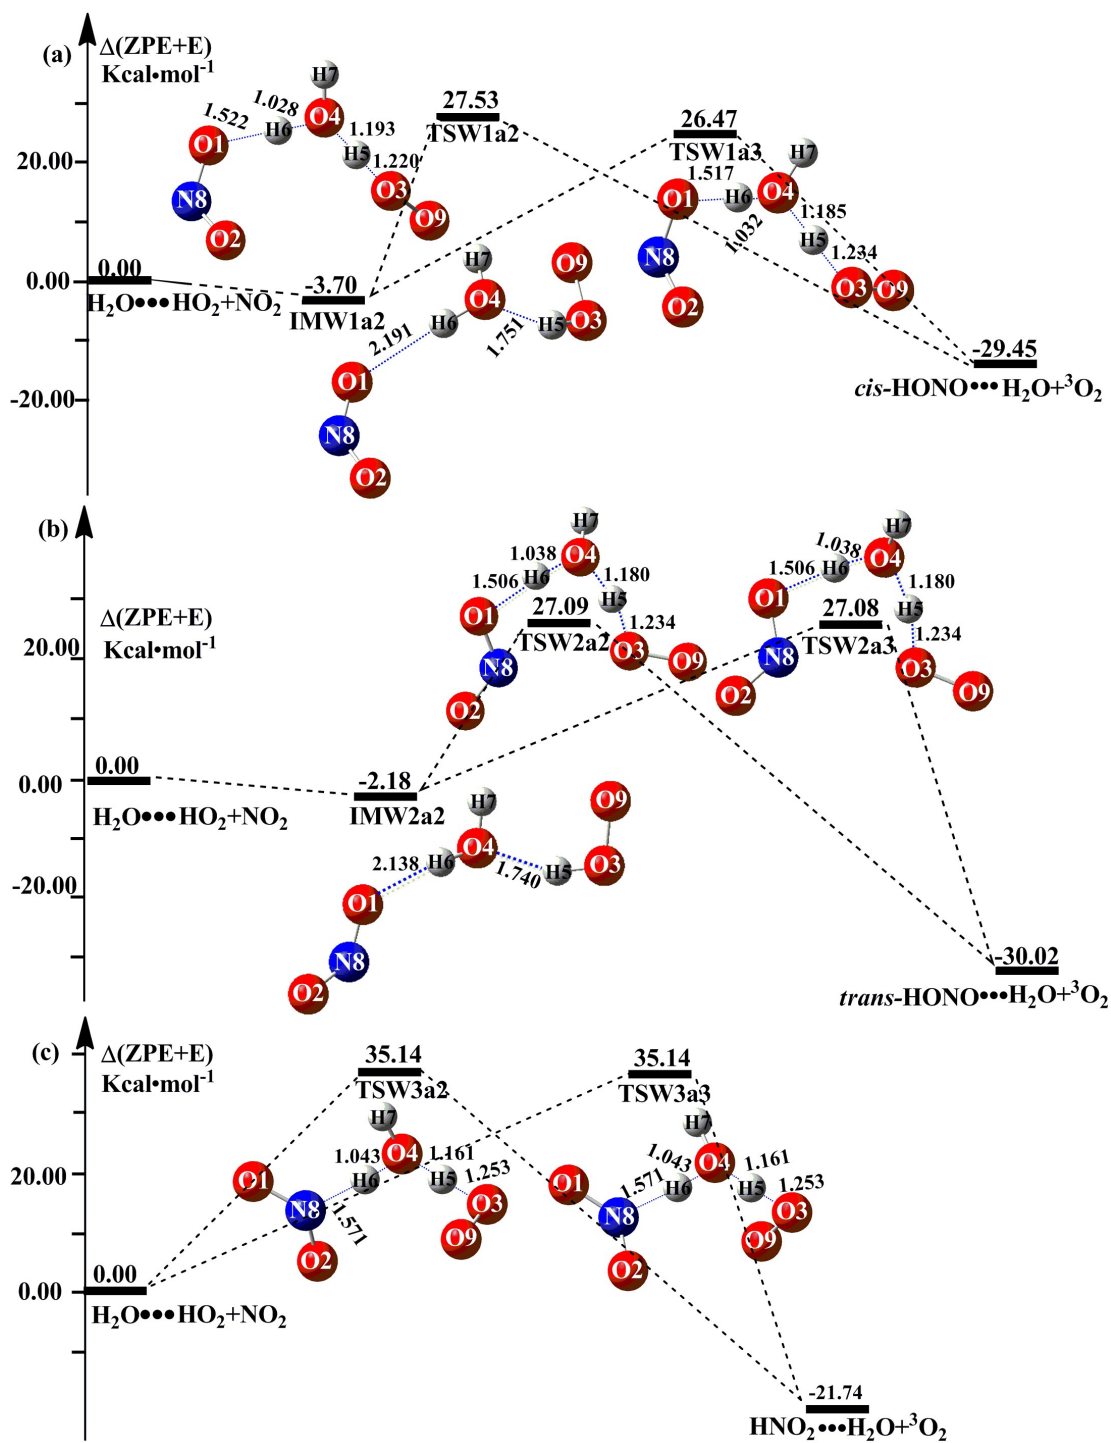

**Fig S6** Less favorable schematic energy diagrams of the formation of (a) *cis*-HONO $\cdots\text{H}_2\text{O}+^3\text{O}_2$ ; (b) *trans*-HONO $\cdots\text{H}_2\text{O}+^3\text{O}_2$  and (c) HNO<sub>2</sub> $\cdots\text{H}_2\text{O}+^3\text{O}_2$  in the  $\text{H}_2\text{O}\cdots\text{HO}_2+\text{NO}_2$  reaction

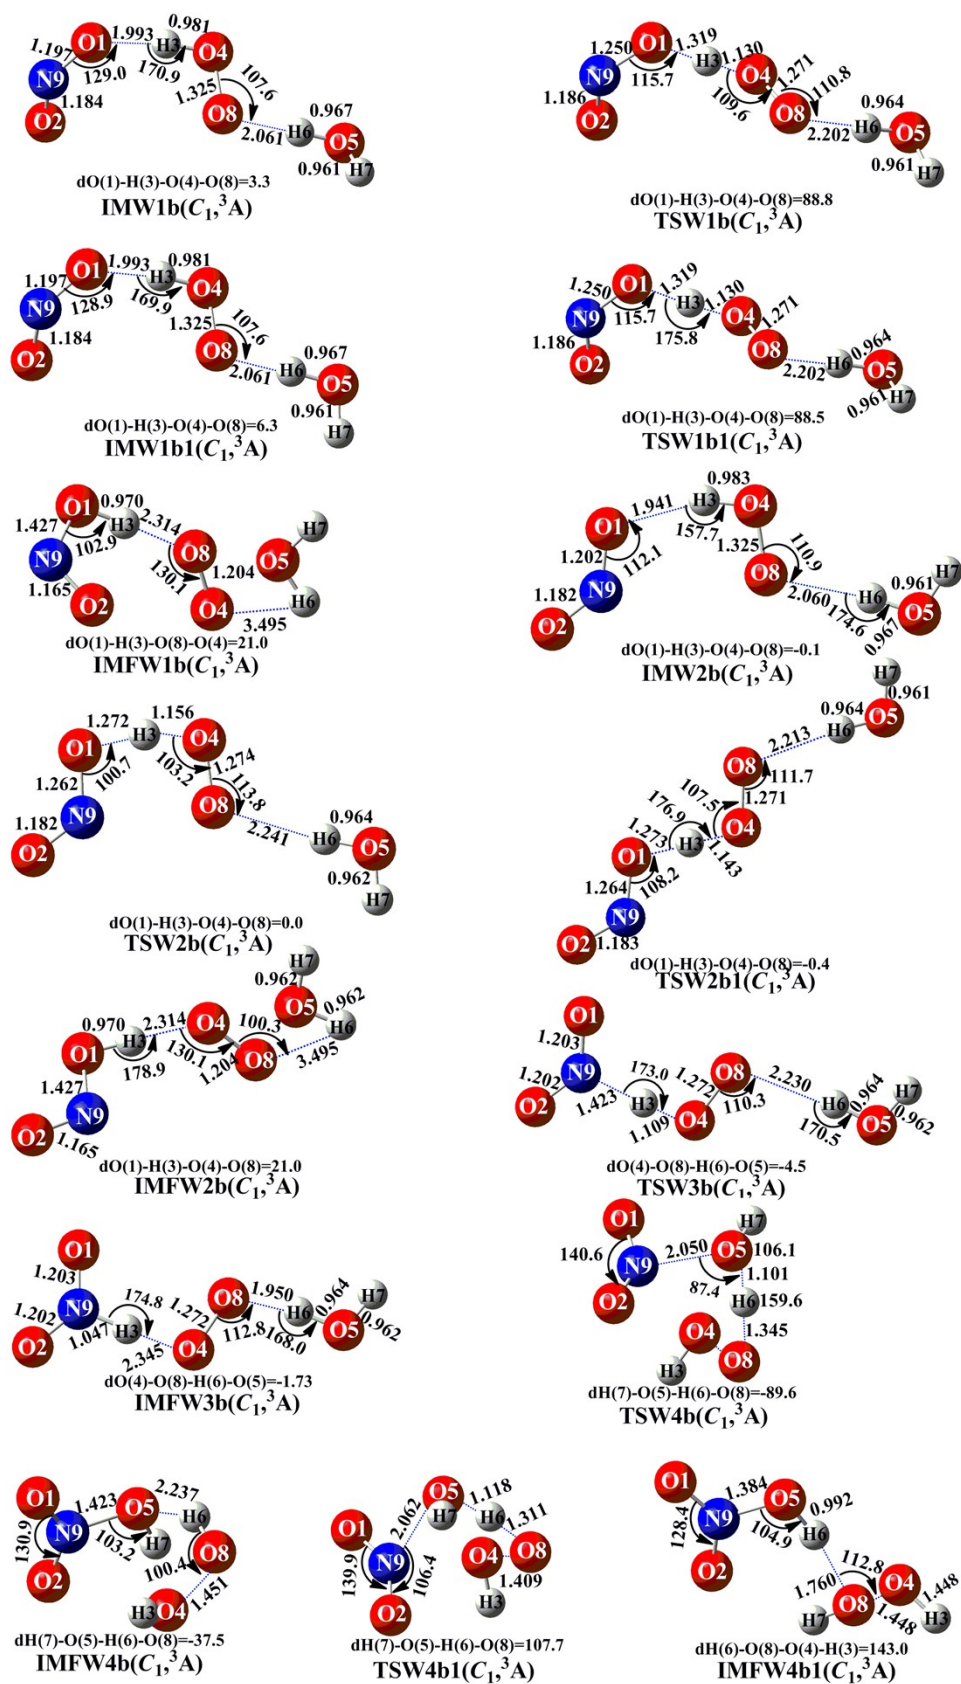

**Fig S7** The geometrical structures of the optimized transition state, intermediates, and complexes involving the  $HO_2 \cdots H_2O + NO_2$  reaction and Schematic energy diagrams of the formation of  $HNO_3 + H_2O_2$  in the  $H_2O \cdots HO_2 + NO_2$  reaction



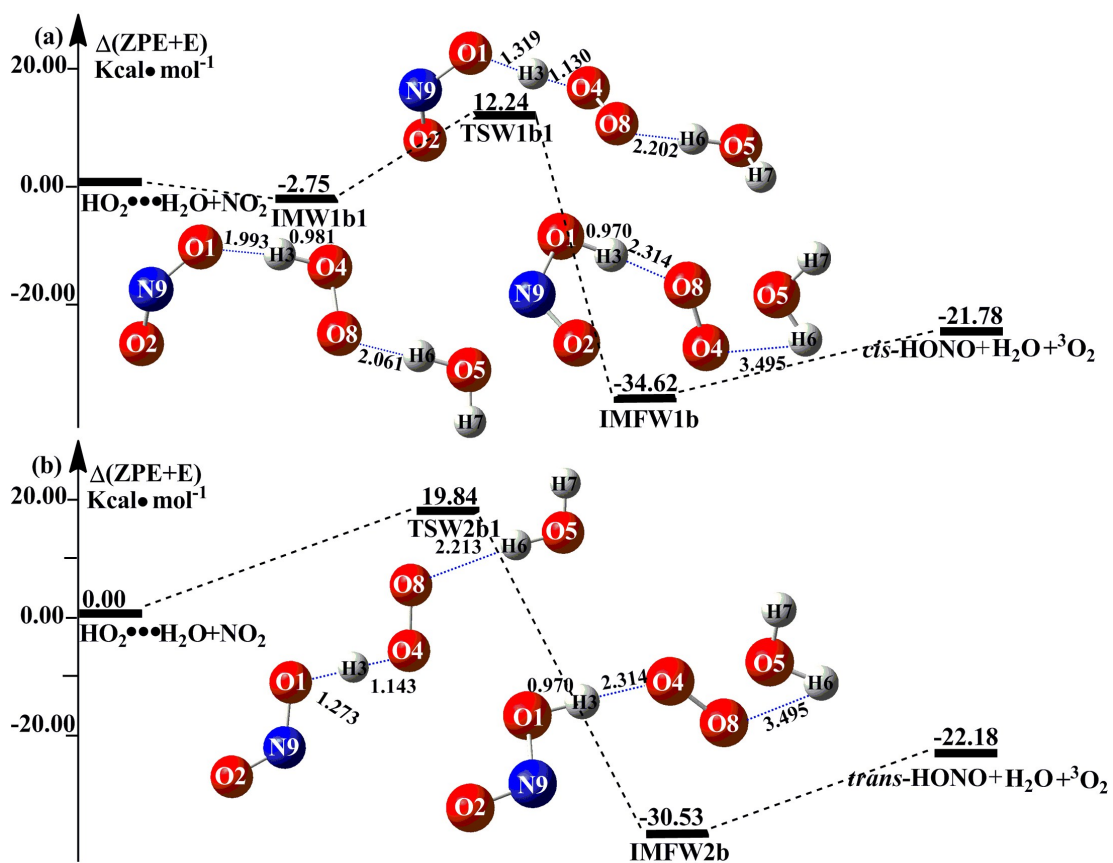

**Fig S8** Less favorable schematic energy diagrams of the formation of (a) *cis*-HONO+H $_2$ O+ $^3$ O $_2$ ; (b) *trans*-HONO+H $_2$ O+ $^3$ O $_2$  in the HO $_2$  $\cdots$ H $_2$ O+NO $_2$  reaction

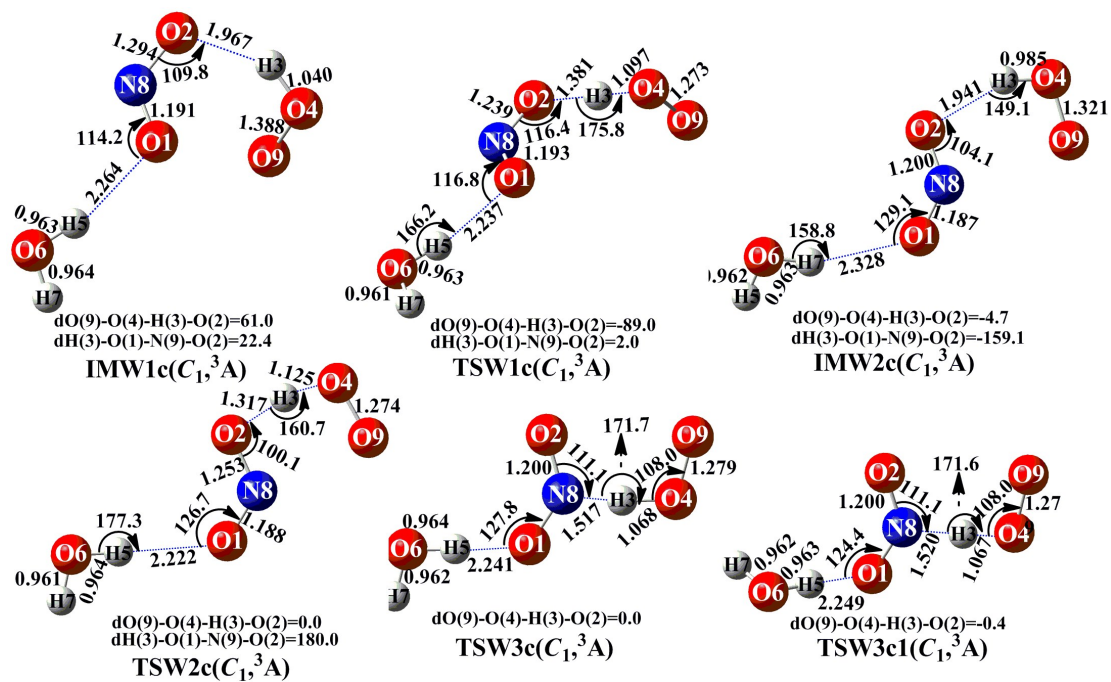

**Fig. S9** The geometrical structures of the optimized transition state, intermediates, and complexes involving the  $NO_2 \cdots H_2O + HO_2$  reaction

**Table S1.**  $T_1$  diagnostic values for the species that involved in the title reactions of  $\text{NO}_2 + \text{HO}_2$  without and with a water molecule

| Species                                          | $T_1$  | Species                                                 | $T_1$  | Species                                                 | $T_1$  |
|--------------------------------------------------|--------|---------------------------------------------------------|--------|---------------------------------------------------------|--------|
| <i>cis</i> -HONO                                 | 0.0115 | $^3\text{O}_2$                                          | 0.0176 | <b>IMW1b1</b>                                           | 0.0274 |
| <i>trans</i> -HONO                               | 0.0117 | $\text{H}_2\text{O}\cdots\text{HO}_2$                   | 0.0210 | <b>TSW1b1</b>                                           | 0.0400 |
| $\text{HNO}_2$                                   | 0.0203 | <b>IMW1a</b>                                            | 0.0214 | <b>IMFW1b</b>                                           | 0.0185 |
| $^1\text{O}_2$                                   | 0.0152 | <b>TSW1a</b>                                            | 0.0330 | <b>IMW2b</b>                                            | 0.0267 |
| $\text{NO}_2$                                    | 0.0244 | <b>IMW1a1</b>                                           | 0.0214 | <b>TSW2b</b>                                            | 0.0477 |
| $\text{H}_2\text{O}$                             | 0.0101 | <b>TSW1a1</b>                                           | 0.0330 | <b>TSW2b1</b>                                           | 0.0469 |
| $\text{HO}_2$                                    | 0.0301 | <b>IMW1a2</b>                                           | 0.0273 | <b>IMFW2b</b>                                           | 0.0250 |
| $^1\text{TSa}$                                   | 0.0194 | <b>TSW1a2</b>                                           | 0.0360 | <b>TSW3b</b>                                            | 0.0364 |
| $^1\text{TSa1}$                                  | 0.0194 | <b>TSW1a3</b>                                           | 0.0358 | <b>IMFW3b</b>                                           | 0.0210 |
| $^1\text{TSb}$                                   | 0.0193 | <b>IMW2a</b>                                            | 0.0261 | <b><math>\text{NO}_2\cdots\text{H}_2\text{O}</math></b> | 0.0231 |
| $^1\text{TSb1}$                                  | 0.0149 | <b>TSW2a</b>                                            | 0.0417 | <b>IMW1c</b>                                            | 0.0273 |
| $^1\text{TSc}$                                   | 0.0476 | <b>IMW2a1</b>                                           | 0.0261 | <b>TSW1c</b>                                            | 0.0392 |
| <b>IMa</b>                                       | 0.0298 | <b>TSW2a1</b>                                           | 0.0412 | <b>IMW2c</b>                                            | 0.0255 |
| <b>TSa</b>                                       | 0.0369 | <b>TSW2a2</b>                                           | 0.0408 | <b>TSW2c</b>                                            | 0.0481 |
| <b>TSa1</b>                                      | 0.0354 | <b>IMW2a2</b>                                           | 0.0266 | <b>TSW3c</b>                                            | 0.0420 |
| <b>IMb</b>                                       | 0.0294 | <b>TSW2a3</b>                                           | 0.0419 | <b>TSW3c1</b>                                           | 0.0418 |
| <b>TSb</b>                                       | 0.0394 | <b>TSW3a</b>                                            | 0.0329 | <b>TSW4b</b>                                            | 0.0383 |
| <b>IMb1</b>                                      | 0.0288 | <b>TSW3a1</b>                                           | 0.0328 | <b>IMFW4b</b>                                           | 0.0170 |
| <b>TSb1</b>                                      | 0.0390 | <b>TSW3a2</b>                                           | 0.0325 | <b>TSW4b1</b>                                           | 0.0377 |
| <b>TSc</b>                                       | 0.0312 | <b>TSW3a3</b>                                           | 0.0325 | <b>IMFW4b1</b>                                          | 0.0169 |
| <i>cis</i> -HONO $\cdots\text{H}_2\text{O}$      | 0.0189 | <b><math>\text{HO}_2\cdots\text{H}_2\text{O}</math></b> | 0.0245 |                                                         |        |
| <i>trans</i> -HONO $\cdots\text{H}_2\text{O}$    | 0.0188 | <b>IMW1b</b>                                            | 0.0275 |                                                         |        |
| <b>HONO<math>\cdots\text{H}_2\text{O}</math></b> | 0.0180 | <b>TSW1b</b>                                            | 0.0400 |                                                         |        |

**Table S2** Zero-point energy (ZPE, in kcal·mol<sup>-1</sup>), entropies (S in cal·mol<sup>-1</sup>·k<sup>-1</sup>), relative energies ( $\Delta E$  and  $\Delta(E+ZPE)$  in kcal·mol<sup>-1</sup>), enthalpies ( $\Delta H(298)$  in kcal·mol<sup>-1</sup>), and free energies ( $\Delta G(298)$  in kcal·mol<sup>-1</sup>) for the HO<sub>2</sub> + NO<sub>2</sub> reaction <sup>a</sup>

| Species                                         | ZPE   | S      | $\Delta E$ | $\Delta(E+ZPE)$ | $\Delta H(298)$ | $\Delta G(298)$ |
|-------------------------------------------------|-------|--------|------------|-----------------|-----------------|-----------------|
| HO <sub>2</sub> +NO <sub>2</sub>                | 14.32 | 111.98 | 0.00       | 0.00            | 0.00            | 0.00            |
| <sup>1</sup> TSa                                | 13.98 | 73.97  | 26.44      | 26.10           | -5.36           | 5.97            |
| <sup>1</sup> TSa1                               | 13.98 | 73.97  | 26.44      | 26.09           | -5.36           | 5.97            |
| <b>Trans</b> -HONO+ <sup>1</sup> O <sub>2</sub> | 14.93 | 106.31 | -0.96      | -0.36           | -4.10           | -2.41           |
| <sup>1</sup> TSb                                | 13.94 | 69.87  | 24.35      | 23.96           | -5.78           | 6.77            |
| <sup>1</sup> TSb1                               | 13.94 | 69.87  | 24.35      | 23.96           | -5.79           | 6.77            |
| <b>Cis</b> -HONO+ <sup>1</sup> O <sub>2</sub>   | 14.88 | 106.11 | -0.46      | 0.09            | -4.19           | -2.44           |
| <sup>1</sup> TSc                                | 14.14 | 73.02  | 22.35      | 22.17           | -5.26           | 6.35            |
| HNO <sub>2</sub> + <sup>1</sup> O <sub>2</sub>  | 15.98 | 105.24 | 7.17       | 8.83            | -3.22           | -1.21           |
| IMa                                             | 15.29 | 92.47  | -2.89      | -1.92           | -2.78           | 3.04            |
| TSa                                             | 13.00 | 75.42  | 23.73      | 22.41           | -6.35           | 4.55            |
| TSa1                                            | 12.84 | 80.72  | 13.59      | 12.11           | -6.18           | 3.14            |
| <b>Trans</b> -                                  |       |        |            |                 |                 |                 |
| HONO+ <sup>3</sup> O <sub>2</sub>               | 14.94 | 108.39 | -30.99     | -30.37          | -3.82           | -2.76           |
| IMb                                             | 15.50 | 82.19  | -3.81      | -2.64           | -3.34           | 5.55            |
| TSb                                             | 13.62 | 76.16  | 9.82       | 9.11            | -5.69           | 4.99            |
| IMb1                                            | 15.24 | 86.40  | -2.76      | -1.84           | -3.32           | 4.31            |
| TSb1                                            | 12.81 | 81.47  | 21.27      | 19.75           | -6.14           | 2.95            |
| <b>Cis</b> -HONO+ <sup>3</sup> O <sub>2</sub>   | 14.89 | 108.19 | -30.49     | -29.93          | -3.92           | -2.79           |
| TSc                                             | 13.08 | 79.98  | 9.60       | 8.35            | -6.01           | 3.53            |
| HNO <sub>2</sub> + <sup>3</sup> O <sub>2</sub>  | 16.00 | 107.33 | -22.86     | -21.18          | -2.95           | -1.56           |

<sup>a</sup> ZPE and S values obtained at B3LYP/aug-cc-pVTZ level. The energy values are obtained at CCSD(T)/aug-cc-pVTZ level whereas the H and G corrections are taken from the B3LYP/aug-cc-pVTZ values.

**Table S3** Zero point energy (ZPE, in kcal·mol<sup>-1</sup>), entropies (S in cal·mol<sup>-1</sup>·k<sup>-1</sup>), relative energies ( $\Delta E$  and  $\Delta(E+ZPE)$  in kcal·mol<sup>-1</sup>), enthalpies ( $\Delta H(298)$  in kcal·mol<sup>-1</sup>), and free energies ( $\Delta G(298)$  in kcal·mol<sup>-1</sup>) for water-catalyzed the main channel of HO<sub>2</sub> + NO<sub>2</sub> reaction occurring through H<sub>2</sub>O···HO<sub>2</sub>+ NO<sub>2</sub> reaction

| Species                                                            | ZPE   | S      | $\Delta E$ | $\Delta(E+ZPE)$ | $\Delta H(298)$ | $\Delta G(298)$ |
|--------------------------------------------------------------------|-------|--------|------------|-----------------|-----------------|-----------------|
| H <sub>2</sub> O···HO <sub>2</sub> +NO <sub>2</sub>                | 30.62 | 128.99 | 0.00       | 0.00            | 0.00            | 0.00            |
| IMW1a                                                              | 30.87 | 99.56  | -1.15      | -0.90           | 0.20            | 8.98            |
| TSW1a                                                              | 28.55 | 91.28  | 23.86      | 21.79           | -2.97           | 8.27            |
| IMW1a1                                                             | 30.86 | 99.56  | -1.22      | -0.98           | 0.20            | 8.98            |
| TSW1a1                                                             | 28.55 | 91.29  | 23.86      | 21.79           | -2.97           | 8.27            |
| IMW1a2                                                             | 30.76 | 113.80 | -1.87      | -1.73           | 0.90            | 5.43            |
| TSW1a2                                                             | 27.97 | 97.79  | 30.19      | 27.53           | -3.16           | 6.14            |
| TSW1a3                                                             | 27.75 | 97.63  | 29.34      | 26.47           | -3.38           | 5.97            |
| <i>cis</i> -HONO···H <sub>2</sub> O+ <sup>3</sup> O <sub>2</sub>   | 29.94 | 126.45 | -28.77     | -29.45          | -0.40           | 0.36            |
| IMW2a                                                              | 31.16 | 101.84 | -3.78      | -3.24           | 0.89            | 8.99            |
| TSW2a                                                              | 28.79 | 89.31  | 17.39      | 15.55           | -2.82           | 9.01            |
| IMW2a1                                                             | 31.17 | 101.85 | -3.84      | -3.29           | 0.90            | 8.99            |
| TSW2a1                                                             | 29.00 | 90.12  | 17.42      | 15.80           | -2.53           | 9.13            |
| TSW2a2                                                             | 28.37 | 93.88  | 29.34      | 27.09           | -2.96           | 7.51            |
| IMW2a2                                                             | 30.80 | 105.38 | -2.35      | -2.18           | 0.34            | 7.38            |
| TSW2a3                                                             | 28.38 | 93.88  | 29.33      | 27.08           | -2.95           | 7.51            |
| <i>trans</i> -HONO···H <sub>2</sub> O+ <sup>3</sup> O <sub>2</sub> | 29.80 | 130.32 | -29.19     | -30.02          | -0.25           | -0.65           |
| TSW3a                                                              | 27.95 | 93.26  | 33.69      | 31.01           | -3.38           | 7.27            |
| TSW3a1                                                             | 27.56 | 99.37  | 38.21      | 35.14           | -3.56           | 5.27            |
| TSW3a2                                                             | 27.95 | 93.26  | 33.67      | 30.99           | -3.38           | 7.27            |
| TSW3a3                                                             | 27.56 | 99.36  | 38.21      | 35.14           | -3.56           | 5.28            |
| HONO···H <sub>2</sub> O+ <sup>3</sup> O <sub>2</sub>               | 30.40 | 133.81 | -21.52     | -21.74          | 0.42            | -1.02           |

<sup>a</sup> ZPE and S values obtained at B3LYP/aug-cc-pVTZ level. The energy values are obtained at CCSD(T)/aug-cc-pVTZ level whereas the H and G corrections are taken from the B3LYP/aug-cc-pVTZ value.

**Table S4** Zero point energy (ZPE, in kcal·mol<sup>-1</sup>), entropies (S in cal·mol<sup>-1</sup>·k<sup>-1</sup>), relative energies ( $\Delta E$  and  $\Delta(E+ZPE)$  in kcal·mol<sup>-1</sup>), enthalpies ( $\Delta H(298)$  in kcal·mol<sup>-1</sup>), and free energies ( $\Delta G(298)$  in kcal·mol<sup>-1</sup>) for water-catalyzed the main channel of HO<sub>2</sub> + NO<sub>2</sub> reaction occurring through HO<sub>2</sub>···H<sub>2</sub>O + NO<sub>2</sub> reaction

| Species                                                          | ZPE   | S      | $\Delta E$ | $\Delta(E+ZPE)$ | $\Delta H(298)$ | $\Delta G(298)$ |
|------------------------------------------------------------------|-------|--------|------------|-----------------|-----------------|-----------------|
| HO <sub>2</sub> ···H <sub>2</sub> O+NO <sub>2</sub>              | 29.55 | 138.10 | 0.00       | 0.00            | 0.00            | 0.00            |
| IMW1b                                                            | 30.06 | 117.20 | -3.15      | -2.65           | 0.96            | 7.16            |
| TSW1b                                                            | 27.10 | 108.10 | 14.70      | 12.25           | -2.68           | 6.27            |
| IMW1b1                                                           | 29.97 | 112.10 | -3.17      | -2.75           | 0.36            | 8.10            |
| TSW1b1                                                           | 27.08 | 108.70 | 14.70      | 12.24           | -2.68           | 6.08            |
| IMFW1b                                                           | 30.23 | 107.74 | -35.30     | -34.62          | -0.12           | 8.92            |
| <i>cis</i> -HONO+H <sub>2</sub> O+ <sup>3</sup> O <sub>2</sub>   | 28.22 | 153.3  | -27.24     | -21.78          | -1.67           | -6.21           |
| IMW2b                                                            | 30.25 | 113.70 | -4.41      | -3.71           | 1.03            | 8.29            |
| TSW2b                                                            | 27.77 | 106.10 | 11.30      | 9.52            | -2.18           | 7.34            |
| TSW2b1                                                           | 30.14 | 109.10 | -4.30      | -3.72           | 0.42            | 9.06            |
| IMFW2b                                                           | 29.04 | 109.64 | -30.02     | -30.53          | -0.94           | 7.54            |
| <i>trans</i> -HONO+H <sub>2</sub> O+ <sup>3</sup> O <sub>2</sub> | 28.27 | 153.50 | -27.73     | -22.18          | -1.57           | -6.17           |
| TSW3b                                                            | 27.24 | 105.90 | 10.13      | 7.81            | -2.48           | 7.12            |
| IMFW3b                                                           | 30.52 | 94.42  | -22.62     | -21.65          | -0.76           | 12.26           |
| HONO+H <sub>2</sub> O+ <sup>3</sup> O <sub>2</sub>               | 29.33 | 152.4  | -19.60     | -13.17          | -0.69           | -4.97           |
| TSW4b                                                            | 31.37 | 80.17  | 24.90      | 26.73           | -0.52           | 16.73           |
| IMFW4b                                                           | 33.87 | 94.29  | -22.35     | -18.03          | 3.07            | 16.12           |
| TSW4b1                                                           | 31.10 | 80.65  | 26.31      | 27.85           | -0.78           | 16.34           |
| IMFW4b1                                                          | 34.50 | 89.06  | -27.02     | -22.08          | 3.27            | 17.89           |
| HNO <sub>3</sub> +H <sub>2</sub> O <sub>2</sub>                  | 33.01 | 119.40 | -17.59     | -14.12          | 1.77            | 7.35            |

<sup>a</sup> ZPE and S values obtained at B3LYP/aug-cc-pVTZ level. The energy values are obtained at CCSD(T)/aug-cc-pVTZ level whereas the H and G corrections are taken from the B3LYP/aug-cc-pVTZ value.

**Table S5** Zero point energy (ZPE, in kcal·mol<sup>-1</sup>), entropies (S in cal·mol<sup>-1</sup>·k<sup>-1</sup>), relative energies ( $\Delta E$  and  $\Delta(E+ZPE)$  in kcal·mol<sup>-1</sup>), enthalpies ( $\Delta H(298)$  in kcal·mol<sup>-1</sup>), and free energies ( $\Delta G(298)$  in kcal·mol<sup>-1</sup>) for water-catalyzed the main channel of HO<sub>2</sub> + NO<sub>2</sub> reaction occurring through NO<sub>2</sub>···H<sub>2</sub>O+HO<sub>2</sub> reaction

| Species                                                            | ZPE   | S      | $\Delta E$ | $\Delta(E+ZPE)$ | $\Delta H(298)$ | $\Delta G(298)$ |
|--------------------------------------------------------------------|-------|--------|------------|-----------------|-----------------|-----------------|
| NO <sub>2</sub> ···H <sub>2</sub> O+HO <sub>2</sub>                | 28.52 | 143.80 | 0.00       | 0.00            | 0.00            | 0.00            |
| IMW1c                                                              | 30.76 | 113.80 | -9.91      | -7.68           | 1.79            | 10.73           |
| TSW1c                                                              | 27.16 | 109.90 | 12.97      | 11.60           | -2.00           | 8.10            |
| <i>cis</i> -HONO···H <sub>2</sub> O+ <sup>3</sup> O <sub>2</sub>   | 29.94 | 126.40 | -36.81     | -35.39          | 0.49            | 5.66            |
| IMW2c                                                              | 29.66 | 110.00 | -3.63      | -2.49           | 0.73            | 10.80           |
| TSW2c                                                              | 27.97 | 103.70 | 8.88       | 8.33            | -1.54           | 10.42           |
| <i>trans</i> -HONO···H <sub>2</sub> O+ <sup>3</sup> O <sub>2</sub> | 29.80 | 130.30 | -37.23     | -35.96          | 0.65            | 4.65            |
| TSW3c                                                              | 27.52 | 110.80 | 10.39      | 9.38            | -1.64           | 8.19            |
| TSW3c1                                                             | 27.56 | 110.00 | 10.31      | 9.35            | -1.61           | 8.45            |
| HONO···H <sub>2</sub> O+ <sup>3</sup> O <sub>2</sub>               | 30.40 | 133.80 | -29.56     | -27.68          | 1.31            | 4.28            |

<sup>a</sup> ZPE and S values obtained at B3LYP/aug-cc-pVTZ level. The energy values are obtained at CCSD(T)/aug-cc-pVTZ level whereas the H and G corrections are taken from the B3LYP/aug-cc-pVTZ value.

**Table S6** Rate constants ( $\text{cm}^3 \cdot \text{molecules}^{-1} \cdot \text{s}^{-1}$ ) for main reaction of the  $\text{HO}_2 + \text{NO}_2$  reaction within the temperature range of 240.0–425.0 K

| $T/\text{K}$ | $k_{\text{R1}}$ | $k_{\text{R2}}$ | $k_{\text{R3}}$ | $k_{\text{R}}$ |
|--------------|-----------------|-----------------|-----------------|----------------|
| 240          | 2.54E-17        | 1.95E-15        | 3.66E-15        | 5.64E-15       |
| 250          | 2.28E-17        | 1.57E-15        | 2.94E-15        | 4.53E-15       |
| 278          | 1.80E-17        | 9.39E-16        | 1.75E-15        | 2.71E-15       |
| 288          | 1.68E-17        | 8.07E-16        | 1.49E-15        | 2.31E-15       |
| 298          | 1.59E-17        | 7.02E-16        | 1.29E-15        | 2.01E-15       |
| 308          | 1.51E-17        | 6.18E-16        | 1.13E-15        | 1.76E-15       |
| 325          | 1.40E-17        | 5.06E-16        | 9.22E-16        | 1.44E-15       |
| 375          | 1.21E-17        | 3.15E-16        | 5.73E-16        | 9.00E-16       |
| 425          | 1.13E-17        | 2.26E-16        | 4.09E-16        | 6.46E-16       |

$k_{\text{R1}}$  is the rate constant of Channel R1;  $k_{\text{R2}}$  is the rate constant of Channel R2, and  $k_{\text{R3}}$  is the rate constant of Channel R3.



**Table S7** Rate constants ( $\text{cm}^3 \cdot \text{molecules}^{-1} \cdot \text{s}^{-1}$ ) for main reaction of the  $\text{HO}_2 + \text{NO}_2$  reaction occurring through  $\text{H}_2\text{O} \cdots \text{HO}_2 + \text{NO}_2$  reaction within the temperature range of 240.0–425.0K

| $T/\text{K}$ | $k_{\text{RW1a1}}$ | $k_{\text{RW1a2}}$ | $k_{\text{RW1a3}}$ | $k_{\text{RW1a4}}$ | $k_{\text{RW1a}}$  | $k_{\text{RW2a1}}$ | $k_{\text{RW2a2}}$ | $k_{\text{RW2a3}}$ |
|--------------|--------------------|--------------------|--------------------|--------------------|--------------------|--------------------|--------------------|--------------------|
| 240          | 9.56E-28           | 9.56E-27           | 3.59E-38           | 6.94E-31           | 1.05E-26           | 1.73E-22           | 8.33E-32           | 8.33E-32           |
| 250          | 2.52E-27           | 2.52E-26           | 4.30E-37           | 1.42E-30           | 2.77E-26           | 3.94E-22           | 2.70E-31           | 2.70E-31           |
| 278          | 4.00E-26           | 4.00E-25           | 1.98E-34           | 1.37E-29           | 4.40E-25           | 3.81E-21           | 8.76E-30           | 8.76E-30           |
| 288          | 1.06E-25           | 1.06E-24           | 1.36E-33           | 3.31E-29           | 1.17E-24           | 8.26E-21           | 3.11E-29           | 3.11E-29           |
| 298          | 2.78E-25           | 2.78E-24           | 8.33E-33           | 8.20E-29           | 3.06E-24           | 1.74E-20           | 1.10E-28           | 1.10E-28           |
| 308          | 7.12E-25           | 7.11E-24           | 4.57E-32           | 2.07E-28           | 7.82E-24           | 3.58E-20           | 3.77E-28           | 3.77E-28           |
| 325          | 3.29E-24           | 3.29E-23           | 6.56E-31           | 1.01E-27           | 3.62E-23           | 1.13E-19           | 2.86E-27           | 2.86E-27           |
| 375          | 1.74E-22           | 1.74E-21           | 4.35E-28           | 8.57E-26           | 1.91E-21           | 2.12E-18           | 5.53E-25           | 5.53E-25           |
| 425          | 4.39E-21           | 4.39E-20           | 6.61E-26           | 3.85E-24           | 4.83E-20           | 2.22E-17           | 3.92E-23           | 3.92E-23           |
| $T/\text{K}$ | $k_{\text{RW2a4}}$ | $k_{\text{RW2a}}$  | $k_{\text{RW3a1}}$ | $k_{\text{RW3a2}}$ | $k_{\text{RW3a3}}$ | $k_{\text{RW3a4}}$ | $k_{\text{RW3a}}$  |                    |
| 240          | 3.13E-30           | 1.73E-22           | 4.46E-32           | 4.60E-32           | 3.13E-34           | 3.14E-34           | 9.12E-32           |                    |
| 250          | 8.93E-30           | 3.94E-22           | 1.14E-31           | 1.18E-31           | 9.40E-34           | 9.45E-34           | 2.34E-31           |                    |
| 278          | 1.95E-28           | 3.81E-21           | 1.80E-30           | 1.85E-30           | 2.35E-32           | 2.36E-32           | 3.70E-30           |                    |
| 288          | 6.05E-28           | 8.26E-21           | 5.02E-30           | 5.16E-30           | 7.73E-32           | 7.77E-32           | 1.03E-29           |                    |
| 298          | 1.87E-27           | 1.74E-20           | 1.42E-29           | 1.46E-29           | 2.59E-31           | 2.60E-31           | 2.93E-29           |                    |
| 308          | 5.73E-27           | 3.58E-20           | 4.06E-29           | 4.18E-29           | 8.79E-31           | 8.83E-31           | 8.41E-29           |                    |
| 325          | 3.65E-26           | 1.13E-19           | 2.44E-28           | 2.51E-28           | 7.06E-30           | 7.09E-30           | 5.09E-28           |                    |
| 375          | 4.87E-24           | 2.12E-18           | 3.79E-26           | 3.88E-26           | 2.45E-27           | 2.46E-27           | 8.16E-26           |                    |
| 425          | 2.71E-22           | 2.22E-17           | 2.98E-24           | 3.04E-24           | 3.76E-25           | 3.78E-25           | 6.77E-24           |                    |

$k_{\text{RW1a}}$  ( $k_{\text{RW1a}} = k_{\text{RW1a1}} + k_{\text{RW1a2}} + k_{\text{RW1a3}} + k_{\text{RW1a4}}$ ) is the rate constant of Channel RW1a;  $k_{\text{RW2a}}$  ( $k_{\text{RW2a}} = k_{\text{RW2a1}} + k_{\text{RW2a2}} + k_{\text{RW2a3}} + k_{\text{RW2a4}}$ ) is the rate constant of Channel RW2a, and  $k_{\text{RW3a}}$  ( $k_{\text{RW3a}} = k_{\text{RW3a1}} + k_{\text{RW3a2}} + k_{\text{RW3a3}} + k_{\text{RW3a4}}$ ) is the rate constant of Channel RW3a.

**Table S8** Rate constants ( $\text{cm}^3 \cdot \text{molecules}^{-1} \cdot \text{s}^{-1}$ ) for main reaction of the  $\text{HO}_2 + \text{NO}_2$  reaction occurring through  $\text{HO}_2 \cdots \text{H}_2\text{O} + \text{NO}_2$  reaction within the temperature range of 240.0–425.0K

| $T/\text{K}$ | $k_{\text{RW1b1}}$ | $k_{\text{RW1b2}}$ | $k_{\text{RW1b}}$ | $k_{\text{RW2b1}}$ | $k_{\text{RW2b2}}$ | $k_{\text{RW2b}}$ | $k_{\text{RW3b}}$ |
|--------------|--------------------|--------------------|-------------------|--------------------|--------------------|-------------------|-------------------|
| 240          | 8.46E-14           | 2.66E-14           | 1.11E-13          | 1.98E-12           | 1.35E-09           | 1.35E-09          | 5.42E-12          |
| 250          | 9.71E-14           | 3.73E-14           | 1.34E-13          | 2.37E-12           | 6.14E-10           | 6.16E-10          | 8.30E-12          |
| 278          | 1.91E-13           | 1.06E-13           | 2.97E-13          | 4.47E-12           | 1.76E-10           | 1.80E-10          | 2.58E-11          |
| 288          | 2.61E-13           | 1.58E-13           | 4.20E-13          | 5.80E-12           | 1.47E-10           | 1.53E-10          | 3.78E-11          |
| 298          | 3.60E-13           | 2.38E-13           | 5.99E-13          | 7.62E-12           | 1.35E-10           | 1.43E-10          | 5.46E-11          |
| 308          | 5.18E-13           | 3.58E-13           | 8.78E-13          | 1.01E-11           | 1.33E-10           | 1.43E-10          | 7.79E-11          |
| 325          | 9.51E-13           | 7.18E-13           | 1.67E-12          | 1.63E-11           | 1.47E-10           | 1.63E-10          | 1.39E-10          |
| 375          | 5.42E-12           | 5.01E-12           | 1.05E-11          | 6.56E-11           | 2.93E-10           | 3.59E-10          | 6.17E-10          |
| 425          | 2.53E-11           | 2.75E-11           | 5.33E-11          | 2.31E-10           | 6.63E-10           | 8.94E-10          | 2.14E-09          |
| $T/\text{K}$ | $k_{\text{RW4b1}}$ | $k_{\text{RW4b2}}$ | $k_{\text{RW4b}}$ |                    |                    |                   |                   |
| 240          | 1.75E-34           | 2.85E-35           | 2.04E-34          |                    |                    |                   |                   |
| 250          | 1.41E-33           | 2.42E-34           | 1.65E-33          |                    |                    |                   |                   |
| 278          | 2.25E-31           | 4.48E-32           | 2.70E-31          |                    |                    |                   |                   |
| 288          | 1.09E-30           | 2.28E-31           | 1.32E-30          |                    |                    |                   |                   |
| 298          | 4.75E-30           | 1.05E-30           | 5.80E-30          |                    |                    |                   |                   |
| 308          | 1.89E-29           | 4.37E-30           | 2.33E-29          |                    |                    |                   |                   |
| 325          | 1.63E-28           | 4.07E-29           | 2.04E-28          |                    |                    |                   |                   |
| 375          | 3.03E-26           | 9.22E-27           | 3.95E-26          |                    |                    |                   |                   |
| 425          | 1.69E-24           | 6.04E-25           | 2.29E-24          |                    |                    |                   |                   |

$k_{\text{RW1b}}$  ( $k_{\text{RW1b}} = k_{\text{RW1b1}} + k_{\text{RW1b2}}$ ) is the rate constant of Channel RW1b;  $k_{\text{RW2b}}$  ( $k_{\text{RW2b}} = k_{\text{RW2b1}} + k_{\text{RW2b2}}$ ) is the rate constant of Channel RW2b;  $k_{\text{RW3b}}$  is the rate constant of Channel RW3b, and  $k_{\text{RW4}}$  ( $k_{\text{RW4}} = k_{\text{RW4b1}} + k_{\text{RW4b2}}$ ) is the rate constant of Channel RW4.

**Table S9** Rate constants ( $\text{cm}^3 \cdot \text{molecules}^{-1} \cdot \text{s}^{-1}$ ) for main reaction of the  $\text{HO}_2 + \text{NO}_2$  reaction occurring through  $\text{NO}_2 \cdots \text{H}_2\text{O} + \text{HO}_2$  reaction within the temperature range of 240.0–425.0 K

| T   | $k_{\text{RW1c}}$ | $k_{\text{RW2c}}$ | $k_{\text{RW3c1}}$ | $k_{\text{RW3c2}}$ | $k_{\text{RW3c}}$ |
|-----|-------------------|-------------------|--------------------|--------------------|-------------------|
| 240 | 1.27E-15          | 1.39E-13          | 1.30E-14           | 9.44E-15           | 2.25E-14          |
| 250 | 2.25E-15          | 1.92E-13          | 2.85E-14           | 2.07E-14           | 4.91E-14          |
| 278 | 1.15E-14          | 4.85E-13          | 1.94E-13           | 1.40E-13           | 3.34E-13          |
| 288 | 2.03E-14          | 6.74E-13          | 3.54E-13           | 2.55E-13           | 6.09E-13          |
| 298 | 3.52E-14          | 9.32E-13          | 6.23E-13           | 4.47E-13           | 1.07E-12          |
| 308 | 5.99E-14          | 1.28E-12          | 1.06E-12           | 7.59E-13           | 1.82E-12          |
| 325 | 1.41E-13          | 2.16E-12          | 2.44E-12           | 1.74E-12           | 4.19E-12          |
| 375 | 1.28E-12          | 8.59E-12          | 1.90E-11           | 1.35E-11           | 3.25E-11          |
| 425 | 7.65E-12          | 2.76E-11          | 9.55E-11           | 6.72E-11           | 1.63E-10          |

$k_{\text{RW1c}}$  is the rate constant of Channel RW1c;  $k_{\text{RW2c}}$  is the rate constant of Channel RW2c, and  $k_{\text{RW3c}}$  ( $k_{\text{RW3c}} = k_{\text{RW3c1}} + k_{\text{RW3c2}}$ ) is the rate constant of Channel RW3c.
